# Supplementary material for: Self-assembled composite nano-materials exploiting a thermo reversible n-acene fibrillar scaffold and organic-capped ZnO nanoparticles
Source: Royal Society of Chemistry journal article supplement (doi:10.1039/c0jm02603d), 2011-01-01
Supplement: c0jm02603d.pdf [file c0jm02603d.pdf]

## Supporting Information

### Self-Assembled Composite Nano-Materials exploiting a Thermo-Reversible *n*-Acene Fibrillar Scaffold and Organic-Capped ZnO Nanoparticles

Rajat K. Das,<sup>1,4</sup> Shreedhar Bhat,<sup>1,2,3</sup> Supratim Banerjee,<sup>1,4</sup> Cyril Aymonier,<sup>2</sup> Anne Loppinet-Serani,<sup>2</sup> Pierre Terech,<sup>3</sup> Uday Maitra,<sup>4</sup> Guillaume Raffy,<sup>1</sup> Jean-Pierre Desvergne<sup>1</sup> and André Del Guerzo<sup>\*,1</sup>

#### Table of contents:

**Figure SI1.** TEM images of some ZnO NPs.

**Figure SI2.** Absorption spectrum of A9-NPs in toluene.

**Figure SI3.** TEM/SEM images of the aerogels of  
DDOA in scCO<sub>2</sub>, obtained in presence of ZnO NPs.

**Figure SI4.** Photos of OL-NPs in toluene.

**Table SI1.** XRD data for the synthesized ZnO NPs

**Table SI2.** Dynamic Rheology data for DDOA and DDOA-NP gels in *n*-BuOH.

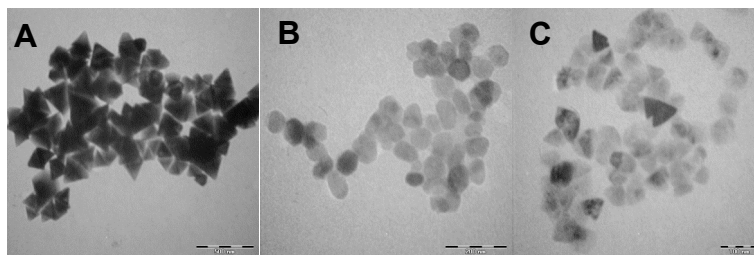

**Fig. SI.1** TEM images of some ZnO NPs: (A) NM1 (scale bar 500 nm) from thermal decomposition (240°C) of zinc acetate in hexadecylamine, average size 50 nm (from TEM), 47 nm (from XRD); (B) NM2 (scale bar 100 nm) from thermal decomposition (220°C) of zinc cupferronate in n-octylamine, average size 35 nm (TEM), 41 nm (from XRD); (C) NM3 (scale bar 200 nm) from thermal decomposition (250°C) of zinc oleate in oleic acid/oleylamine mixture, average size 40 nm (TEM), 34 nm (from XRD).

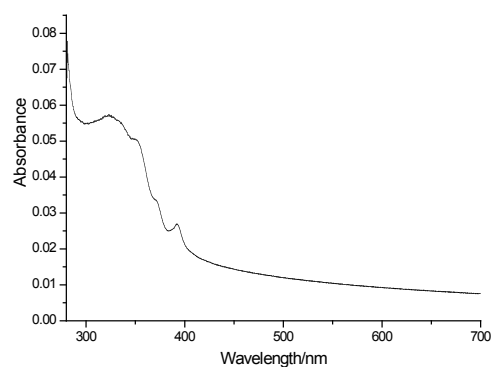

**Figure SI2.** (a) Absorption spectrum of  $1.8 \times 10^{-7}$  M A9-NPs in toluene, optical path length is 1 cm.

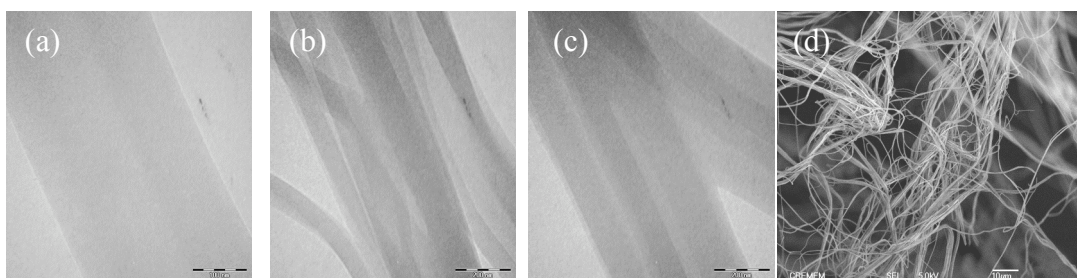

**Figure SI3.** TEM images of DDOA aerogels obtained from  $\text{scCO}_2$ , containing the following ZnO NPs: (a) OL-NPs, scale bar 100 nm; (b) A23-NPs, scale bar 200 nm; (c) A9-NPs, scale bar 200 nm. (d) SEM image of DDOA aerogel obtained in the presence of OL-NPs, scale bar 10  $\mu\text{m}$ .

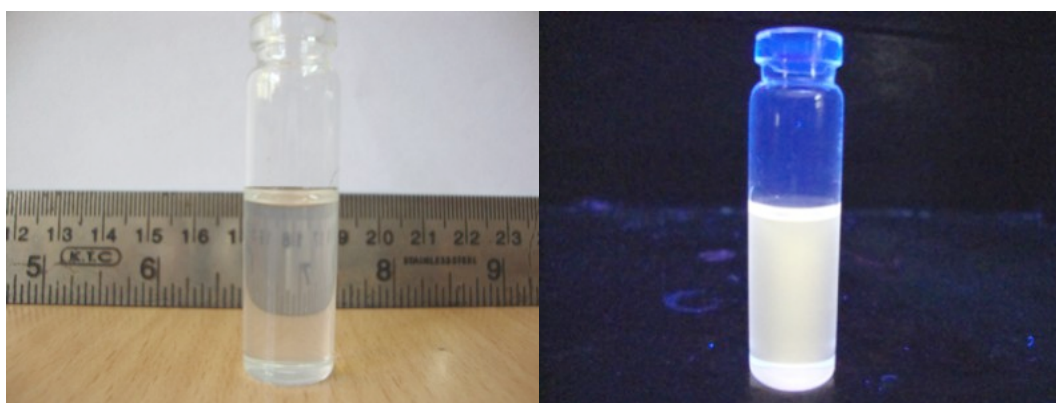

**Figure SI4.** Photos of OL-NPs in toluene: left at daylight, right under UV irradiation in a dark room.

**Table SI1:** XRD data for the ZnO NPs synthesized.

| Sl. No  | Fitting accuracy $R^2$ for Gaussian | Peak center Å | Peak height Intensity, a.u. | TEM average particle size /nm | XRD Estimated particle size /nm | FWHM /nm |
|---------|-------------------------------------|---------------|-----------------------------|-------------------------------|---------------------------------|----------|
| NM1     | 0.98                                | 56.68         | 8620                        | 50                            | 47.01                           | 0.3043   |
| NM2     | 0.99                                | 56.73         | 4840                        | 35                            | 40.57                           | 0.3530   |
| NM3     | 0.99                                | 56.65         | 4378                        | 40                            | 34.27                           | 0.4171   |
| OL-NPs  | 0.97                                | 56.66         | 554.40                      | 4                             | 5.06                            | 2.8255   |
| A23-NPs | 0.94                                | 56.61         | 240.00                      | 4                             | 4.58                            | 3.1155   |

**Table SI2:** Dynamic rheology data for DDOA and DDOA-NP gels in *n*-BuOH. The  $G'$  and  $G''$  values shown in the table are obtained from frequency sweep experiments performed at a fixed stress of 1.0 Pa. The values are at  $f = 1.0$  Hz. The  $\sigma^*$  values shown are obtained from stress sweep experiments at a fixed frequency of 0.5 Hz.

| Sample Description | $G'$ (Pa) | $G''$ (Pa) | $G'/G''$ | $\sigma^*$ (Pa) |
|--------------------|-----------|------------|----------|-----------------|
| DDOA gel           | 675       | 69         | 9.8      | 44              |
| DDOA/OL-NP         | 690       | 67         | 10.3     | 53              |
| DDOA/A23-NP        | 634       | 70         | 9.1      | 48              |
